# Supplementary material
Source: MDPI journal article supplement (https://www.mdpi.com/2071-1050/12/14/5714)
Supplement: s1 [file s1]

## ADDENDUM 1

### Survey questions

This survey is anonymous and should be answered by one NDA representative per country. It takes around 20 minutes to complete.

It's divided into four sections: (1) General Information, (2) NDA's role in the interplay, (3) Priority Setting and (4) Project Development

---

#### A. GENERAL INFORMATION

- |                                                                                                                                                                                                                                                                                                                                                                                                                                                                                                                                                                                                                                      |                                                                                                                                                                                                                                                                                                                                                                                                           |
|--------------------------------------------------------------------------------------------------------------------------------------------------------------------------------------------------------------------------------------------------------------------------------------------------------------------------------------------------------------------------------------------------------------------------------------------------------------------------------------------------------------------------------------------------------------------------------------------------------------------------------------|-----------------------------------------------------------------------------------------------------------------------------------------------------------------------------------------------------------------------------------------------------------------------------------------------------------------------------------------------------------------------------------------------------------|
| <p>1. Which government entity is nominated as NDA in your country?</p> <p><input type="checkbox"/> Ministry of Finance</p> <p><input type="checkbox"/> Ministry of Environment</p> <p><input type="checkbox"/> Presidency / Prime Minister Office</p> <p><input type="checkbox"/> Other: [Open answer]</p>                                                                                                                                                                                                                                                                                                                           | <p>Nationally Determined Contributions (NDCs) process?</p> <p><i>Please choose between 1 for not involved at all and 7 for very involved</i></p> <p><input type="checkbox"/> 1 – Not involved</p> <p><input type="checkbox"/> 2   <input type="checkbox"/> 3   <input type="checkbox"/> 4   <input type="checkbox"/> 5   <input type="checkbox"/> 6</p> <p><input type="checkbox"/> 7 – Very involved</p> |
| <p>2. Do you hold other functions besides GCF coordination?</p> <p><input type="checkbox"/> None</p> <p><input type="checkbox"/> Yes, governmental ones, related to climate change</p> <p><input type="checkbox"/> Yes, governmental ones, unrelated to climate change</p> <p><input type="checkbox"/> Yes, private sector ones, related to climate change</p> <p><input type="checkbox"/> Yes, private sector ones, unrelated to climate change</p> <p><input type="checkbox"/> Yes, research-oriented ones, related to climate change</p> <p><input type="checkbox"/> Yes, research-oriented ones, unrelated to climate change</p> | <p>4. What is the income level of your country? (According to the World Bank Database 2019-2020. Available here: <a href="https://bit.ly/32R12mv">https://bit.ly/32R12mv</a>)</p> <p><input type="checkbox"/> High income</p> <p><input type="checkbox"/> Upper-middle income</p> <p><input type="checkbox"/> Lower-middle income</p> <p><input type="checkbox"/> Low income</p>                          |
| <p>3. Has the NDA been involved in the preparation of your country's</p>                                                                                                                                                                                                                                                                                                                                                                                                                                                                                                                                                             | <p>5. Does your country belong to any of the following group(s)?</p> <p><input type="checkbox"/> Small Island Developing States (SIDS)</p> <p><input type="checkbox"/> Least Development Countries (LDCs)</p> <p><input type="checkbox"/> African countries</p> <p><input type="checkbox"/> None of the above</p>                                                                                         |
-

---

## B. NDA'S ROLE IN THE INTERPLAY

6. From your perspective, do you think the NDA has sufficient authority to implement its roles?

Explanation: in terms of engagement and responsiveness

*Please choose between 1 for very insufficient authority and 7 for very high authority*

( ) 1 – Insufficient authority  
( ) 2 ( ) 3 ( ) 4 ( ) 5 ( ) 6  
( ) 7 – Very high authority

*Please choose up to 3 (three) main types of stakeholders*

[ ] International Accredited Entities (IAEs)  
[ ] Direct Access Entities (DAEs)  
[ ] GCF Secretariat  
[ ] Local Communities  
[ ] Indigenous people  
[ ] Civil Society Organisations / NGOs  
[ ] Private Sector  
[ ] Research Centres / Universities  
[ ] Other: [Open answer]

- 6.1. **[Follow-up: Q6 ≤ 4]** Why do you think the NDA does not have sufficient authority and how could this be improved?

[Open answer]

7. From your perspective, do you think the NDA has sufficient authority with the broader government?

*Please choose between 1 for very insufficient authority and 7 for very high authority*

( ) 1 – Insufficient authority  
( ) 2 ( ) 3 ( ) 4 ( ) 5 ( ) 6  
( ) 7 – Very high authority

- 7.1. What are the least responsive ministries and how do you think this could be improved?

[Open answer]

8. What are the main NDA stakeholders outside of your governmental affiliation (i.e. Ministry), based on communication intensity?

9. What are the main private sector entities that you have been in contact with for the past year?

*Please choose up to 4 (four) types of entities*

[ ] Multinational corporation / International service provider  
[ ] Service provider based in the capital  
[ ] Small and mid-sized business in the capital  
[ ] Service provider based in the provinces  
[ ] Small and mid-sized business in the provinces  
[ ] Project developer  
[ ] Cooperative  
[ ] Private sector association  
[ ] Domestic bank  
[ ] International bank (with a local branch)  
[ ] Insurance company  
[ ] Microfinance financial institution  
[ ] Other: [Open answer]

10. Under which circumstances has your NDA exchanged with private sector actors, by order of importance?

*Please select and slide to rank the main reasons, from most important on the top to least important on the bottom*

|                                                       |
|-------------------------------------------------------|
| Consultations for the country programming development |
| Readiness programme                                   |
| Preparing the no-objection process                    |
| Private sector's actor as co-Financier in proposal    |
| Concept Note / Funding Proposal development           |
| Nomination of Direct Access Entities (DAEs)           |
| Stakeholder consultations during proposal development |
| General awareness raising activities                  |

**11. What do you think is the main challenge while interacting with private sector?**

- ☐ Private sector is not a priority stakeholder for the NDA in the country
- ☐ Lack of clarity from GCF on potential opportunities for private sector's engagement
- ☐ Private sector is generally not interested
- ☐ Difficulties to reach private sector's actors
- ☐ No challenges so far
- ☐ Other: [Open answer]

**11.1.1. [Follow-up: Q11 = a] Are there any particular reasons for the non-prioritisation of the private sector?**  
[Open answer]

**11.1.2. [Follow-up: Q11 = e] What is in your opinion your NDA's key to success in engaging with the private sector?**  
[Open answer]

**11.2. [Follow-up: Q11 = c and d]**

Why is the private sector not interested?

*Please choose all that apply*

- ☐ It has not contacted the NDA so far
- ☐ It has not replied to contacts made by the NDA
- ☐ Investments needed in order to develop a funding proposal are perceived as too high
- ☐ GCF concessional terms are similar to market conditions
- ☐ Absence of relevant private sector actors for the country's priority areas
- ☐ Overly difficult accreditation process
- ☐ Too long/strict requirements for proposal development
- ☐ Lack of awareness/understanding about the opportunities at the GCF
- ☐ None of the above
- ☐ Other: [Open answer]

**11.2.1. [Follow-up: Q11 = b] What do you think the GCF could do better to support and improve the NDA engagement with the private sector?**  
[Open answer]

**12. How often does your NDA communicate with the GCF Secretariat on a typical month?**

- ☐ up to 5 times
- ☐ between 6 and 10 times
- ☐ between 11 and 15 times
- ☐ between 16 and 20 times
- ☐ more than 21 times

**13. What have been the main reasons for exchanges between your NDA and the GCF?**

*Please choose only the 2 (two) main reasons*

- ☐ Nomination of DAEs
- ☐ Country programming

- ☐ Readiness programme
- ☐ Concept Note / Funding proposal development
- ☐ No-objection letter's communication
- ☐ Other: [Open answer]

14. Have you experienced any challenges when interacting with the GCF?

*Please choose up to 2 (two) challenges*

- ☐ Language barrier
- ☐ Delay in response
- ☐ Unclear process
- ☐ Technical issues (e.g. telephone, internet, time difference)
- ☐ No direct/constant point of contact
- ☐ No challenges
- ☐ Other: [Open answer]

15. How would you rate the GCF responsiveness to your requests?

- ☐ 1 – Bad
- ☐ 2   ☐ 3   ☐ 4   ☐ 5   ☐ 6
- ☐ 7 – Great

16. How would you rate the GCF transparency with regards to its internal processes?

- ☐ 1 – Low transparency
- ☐ 2   ☐ 3   ☐ 4   ☐ 5   ☐ 6
- ☐ 7 – High transparency

17. What of the following roles your NDA has faced most challenges with?

*Please choose up to 3 (three) most important challenges*

- ☐ Knowledge of national climate change priorities, strategies and plans etc
- ☐ Networks with relevant in-country institutions and stakeholders
- ☐ Capacity to facilitate and coordinate country coordination mechanisms and multi-stakeholder engagement
- ☐ Ability to ensure alignment with Country Programme and synergies with other national priorities
- ☐ Ability to ensure compliance with environmental and social safeguards, fiduciary, and gender principles
- ☐ Provide leadership on the deployment of readiness and preparatory support funding
- ☐ Facilitate accreditation process for National Implementation Entities (NIEs) and provide nomination letters to be eligible for accredited Direct Access Entities
- ☐ Facilitate GCF funding proposals development process and the implementation of GCF funded projects/programmes
- ☐ GCF programmes/projects management

---

## C. PRIORITY SETTING

18. What is the status of your country programme (CP)?

- a. ☐ Not started yet
- b. ☐ Under development
- c. ☐ Developed, but waiting for approval by national law/bodies

- d. ☐ Developed, but waiting for approval by national law/bodies
- e. ☐ Submitted

18.1. **[Follow-up: Q18 = b, c, d, e]**  
Who has been directly involved

with the CP development in your country?

*Please select the 3 (three) most closely related*

- ☐ National consultant
- ☐ International consultant
- ☐ National government (e.g. Ministry of Environment)
- ☐ International Organisation (e.g. UNEP, UNDC etc)
- ☐ Multilateral Development Bank
- ☐ University (ies) / Research Centre (s)
- ☐ Local governments
- ☐ National private sector
- ☐ International private sector
- ☐ Civil society organisation (s) / NGO (s)
- ☐ Other: [Open answer]

19. What are the main climate change related priority impact areas for your country?

*Please pick the 3 (three) highest priorities*

- ☐ Energy
- ☐ Transport
- ☐ Buildings, cities, industries and appliances
- ☐ Sustainable land use and forest management
- ☐ Most vulnerable people, communities and regions
- ☐ Health, well-being, food and water security
- ☐ Built environment
- ☐ Resilient ecosystems
- ☐ Others: [Open answer]

20. Do you have a gender policy in your NDA?

- ☐ Yes
- ☐ No
- ☐ I don't know
- ☐ Other: [Open answer]

---

## D. PROJECT DEVELOPMENT

21. Do you have a non-objection procedure (NOP)?

- a. ☐ Yes
- b. ☐ Approved, but not yet implemented
- c. ☐ Under development
- d. ☐ No

21.1.1. **[Follow-up: Q21 = a, b, c]** Do you find the NOP helpful to ensure alignment with your national priorities?

- ☐ 1 – Not helpful at all
- ☐ 2   ☐ 3   ☐ 4   ☐ 5   ☐ 6
- ☐ 7 – Essential

22. How many Readiness projects have been initiated in your country?

- ☐ None   ☐ 1   ☐ 2   ☐ 3   ☐ 4
- ☐ 5   ☐ 6   ☐ 7   ☐ 8 or more

22.1. **[Follow-up: Q22 ≥ 1]** How have Readiness programmes best supported your country's NDA?

*Please choose 2 (two) options that most reflect your Readiness activities*

- ☐ Improved knowledge on climate change
- ☐ Improved understanding of the GCF
- ☐ Improved the understanding on the role of NDAs
- ☐ Improved the engagement with national stakeholders
- ☐ Supported direct access
- ☐ Provided access to finance (e.g. high-impact priorities in country

programmes, alignment of funding proposals with country priorities etc)  
☐ In-depth assessments of national and regional entities' institutional capacity, fiduciary, Environmental and Social Safeguards (ESS) and gender standards  
☐ Mobilised the private sector  
☐ Other: [Open answer]

23. In a few words, how do you think Readiness activities could help you the most with your NDA's work?  
 [Open answer]

24. How many Concept Notes has your country submitted to the GCF?  
☐ None ☐ 1 ☐ 2 ☐ 3 ☐ 4  
☐ 5 ☐ 6 ☐ 7 ☐ 8 ☐ 9  
☐ 10 or more

25. How many of your country's concept notes are currently being developed into funding proposals for consideration by the GCF Board?  
☐ None ☐ 1 ☐ 2 ☐ 3 ☐ 4  
☐ 5 ☐ 6 ☐ 7 ☐ 8 or more

26. How many GCF approved projects do you have in your country? (including national, regional and international projects)  
☐ None ☐ 1 ☐ 2 ☐ 3 ☐ 4  
☐ 5 ☐ 6 ☐ 7 or more

27. How many Direct Accredited Entities have you nominated to the GCF?  
☐ None ☐ 1 ☐ 2 ☐ 3 ☐ 4 ☐ 5  
☐ 6 ☐ 7 ☐ 8 ☐ 9 or more

## 27.1 [Follow-up question from Q27 ≥ 1]

How has been the initial contact with potential DAEs in your country?

- a. ☐ Mostly, NDA approached DAEs
- b. ☐ Mostly, DAEs approached NDAs

### 27.1.1. [Follow-up: Q27.1 = a] Based on what criteria have you approached potential accredited entities?

*Please select the 3 (three) options that best reflect your most recent nomination choices*

- ☐ DAE's portfolio already containing climate-aligned activities
- ☐ Awareness about DAE's strategy to expand into climate activities
- ☐ DAE's experience with implementation of projects with international organisations
- ☐ DAE's size and good reputation
- ☐ Existing NDA contacts with DAE (network)
- ☐ DAE's experience in sectors defined as a country priority
- ☐ Governments' recommendation
- ☐ Call for application
- ☐ Other: [Open answer]
